# Supplementary material for: Effects of Waterlogging at Flowering Stage on the Grain Yield and Starch Quality of Waxy Maize
Source: MDPI journal article supplement (doi:10.3390/plants13010108), 2023-12-29
Supplement: s1 [file s1]

**Table S1.** Meteorological conditions during plant growth in 2014 and 2015.

| Parameter           | Year | March |    |    | April |     |    | May |    |    | June |     |     | July |    |    |
|---------------------|------|-------|----|----|-------|-----|----|-----|----|----|------|-----|-----|------|----|----|
|                     |      | F     | M  | L  | F     | M   | L  | F   | M  | L  | F    | M   | L   | F    | M  | L  |
| Temperature<br>(°C) | 2014 | 7     | 12 | 15 | 16    | 15  | 18 | 18  | 21 | 26 | 24   | 24  | 25  | 24   | 28 | 29 |
|                     | 2015 | 6     | 11 | 14 | 11    | 15  | 20 | 19  | 22 | 22 | 24   | 25  | 23  | 24   | 26 | 29 |
| Rainfall<br>(mm)    | 2014 | 28    | 48 | 17 | 4     | 102 | 22 | 1   | 60 | 4  | 22   | 18  | 35  | 100  | 58 | 90 |
|                     | 2015 | 10    | 90 | 0  | 40    | 25  | 20 | 20  | 45 | 35 | 100  | 100 | 250 | 20   | 75 | 20 |
| Sunlight<br>(h)     | 2014 | 48    | 70 | 54 | 94    | 24  | 56 | 83  | 65 | 90 | 54   | 42  | 32  | 38   | 21 | 58 |
|                     | 2015 | 40    | 30 | 90 | 35    | 60  | 90 | 55  | 65 | 50 | 50   | 55  | 15  | 45   | 30 | 75 |

Note: F, M, L are the first, middle, and last ten-day of a month.

**Table S2.** Effects of waterlogging at the flowering stage on the flour pasting property of waxy maize.

| Year | Hybrid | Water | Granule Size (μm) | Peak1/Peak2 | Relative Crystallinity (%) |
|------|--------|-------|-------------------|-------------|----------------------------|
| 2014 | SYN5   | CK    | 13.54 d           | 3.38 d      | 19.65 d                    |
|      |        | WS    | 14.25 bc          | 5.24 a      | 18.37 e                    |
|      | YN7    | CK    | 14.49 b           | 4.86 b      | 15.64 f                    |
|      |        | WS    | 14.01 c           | 3.79 c      | 19.97 d                    |
| 2015 | SYN5   | CK    | 14.05 c           | 3.55 d      | 37.45 a                    |
|      |        | WS    | 15.59 a           | 3.81 c      | 29.77 b                    |
|      | YN7    | CK    | 15.31 a           | 2.81 e      | 27.78 c                    |
|      |        | WS    | 12.57 e           | 2.75 e      | 29.85 b                    |

Mean value in the same column followed by different letters is significantly different ( $p < 0.05$ ). SYN5, Suyunuo5; YN7, Yunuo7; CK, control; WS, waterlogging.
